# Supplementary material for: Rhizobacterium‐derived diacetyl modulates plant immunity in a phosphate‐dependent manner
Source: PubMed Central journal article supplement — EMBO J. 2019 Dec 5;39(2):e102602. doi: 10.15252/embj.2019102602 (PMC6960444; doi:10.15252/embj.2019102602), 2019-12-05
Supplement: EMBJ-39-e102602-s001.pdf [file EMBJ-39-e102602-s001.pdf]

**Table of Contents:**

1. ManuscriptEMBOJ-2019-102602\_AppendixFigS1
2. ManuscriptEMBOJ-2019-102602\_AppendixFigS2
3. ManuscriptEMBOJ-2019-102602\_AppendixFigS3
4. ManuscriptEMBOJ-2019-102602\_AppendixFigS4
5. ManuscriptEMBOJ-2019-102602\_AppendixFigS5
6. ManuscriptEMBOJ-2019-102602\_AppendixTableS1
7. AppendixFigS3 reference

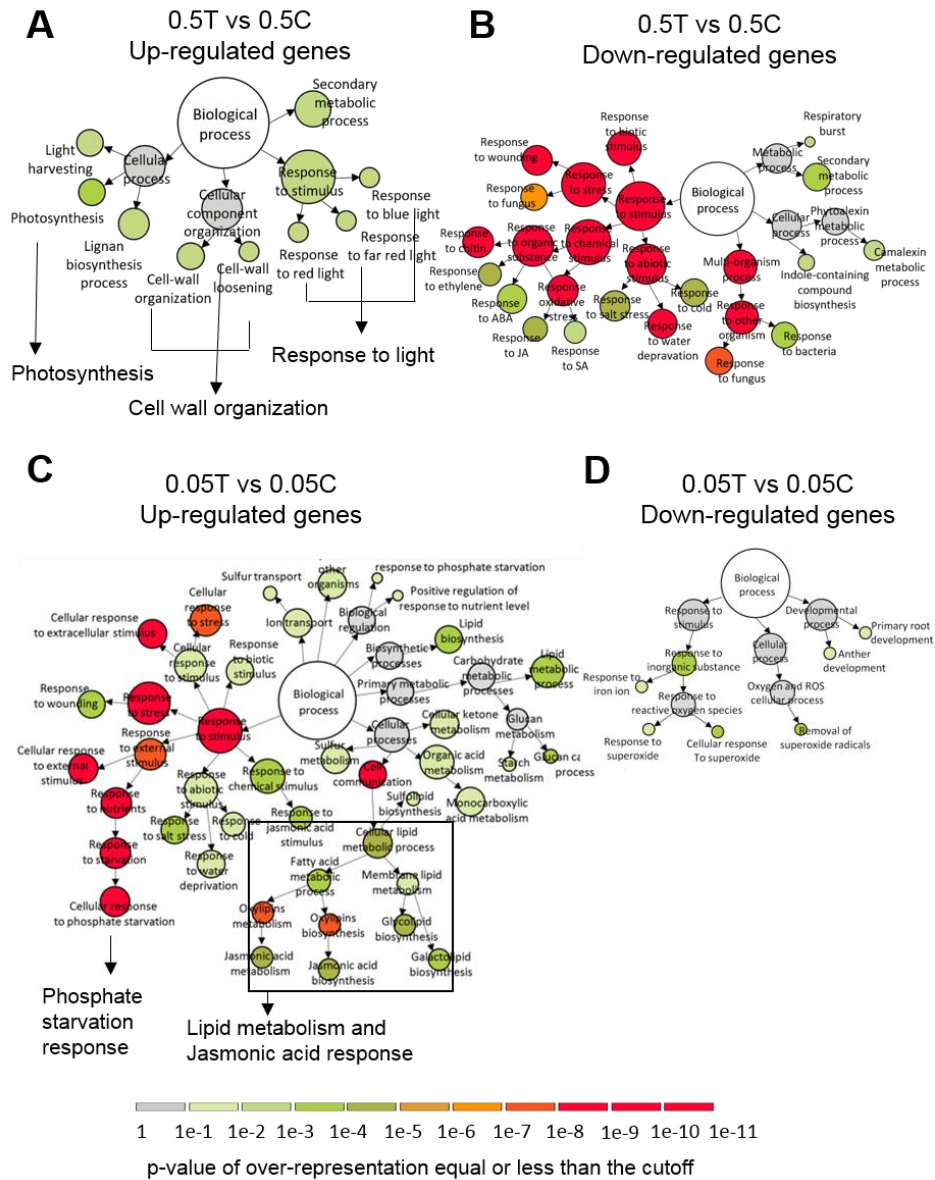

**Appendix Figure S1. Phosphate availability determines *Arabidopsis* responses to GMVs (Related to Figure 1)**

**[A]** GO analysis of GMV-induced genes in *Arabidopsis* grown in 0.5 MS medium. **[B]** GO analysis of GMV-repressed genes in *Arabidopsis* grown in 0.5 MS medium. **[C]** GO analysis of GMV-induced genes in *Arabidopsis* grown in 0.05 MS medium. **[D]** GO analysis of GMV-repressed genes in *Arabidopsis* grown in 0.5 MS medium. Diagrams are designed based on *VirtualPlant* platform. The size of circles represents the number of genes in each GO category. Scale color bar indicates the p-value cut-off of over-representation equal or less than the cutoff for each GO category. Darker color indicates higher possibility of each GO category. DEGs list for key terms are provided in Table EV4.

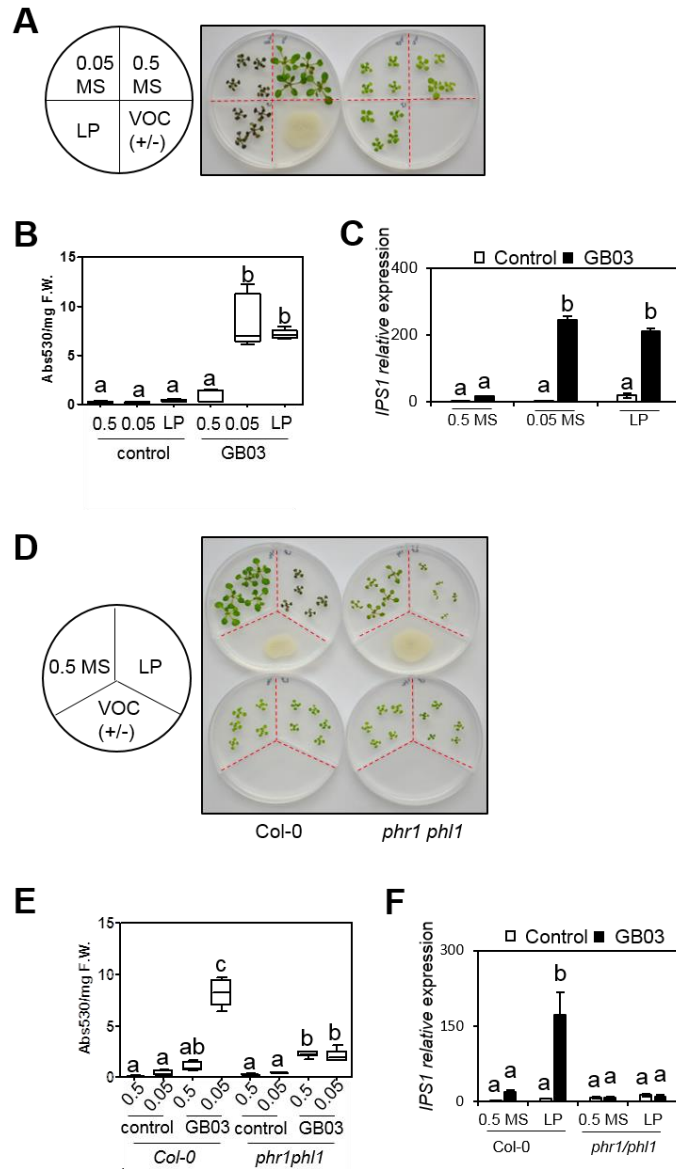

**Appendix Figure S2. The PSR system in Arabidopsis is crucial for the opposed plant responses to GMVs (Related to Figure 2)**

**[A]** Plant Pi deficiency alone (LP) is sufficient to disclose pathogenicity caused by GMVs. Images show 10 DAT plants. **[B], [C]** GMVs caused anthocyanin hyper accumulation (**B**) and IPS1 gene hyper induction (**C**) in plants with Pi deficiency. **[D]** Images of 10 DAT plants, the *phr1phl1* mutant and wild type (*Col-0*) *Arabidopsis*, grown under different conditions. **[E], [F]** Compared to the wild type plants, the *phr1phl1* mutant showed substantially decreased hyper PSR, as shown by anthocyanin (**E**) and IPS1 gene expression (**F**) levels. Anthocyanin measurements and gene expression analyses were performed by using 10 and 5 DAT plants, respectively. The boxplots show representative data from three independent experiments. qPCR results show values of means  $\pm$  SE of three biological replicates. Different letters denote significantly different means at  $p < 0.05$ , Tukey's multiple comparison test.

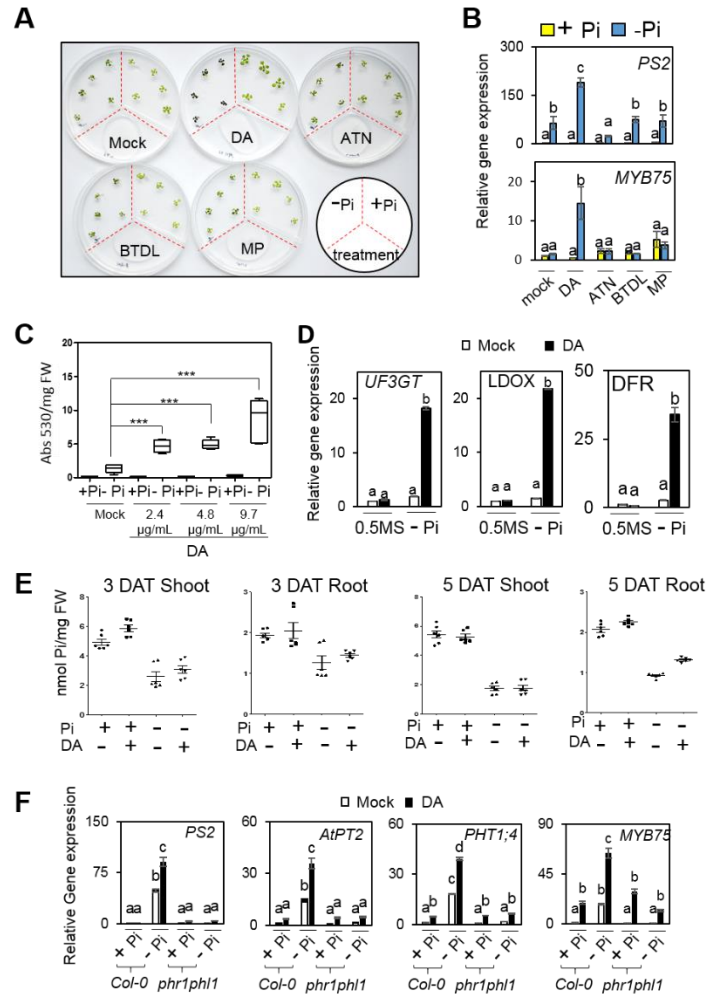

**Appendix Figure S3. DA induces plant hyper sensitivity to Pi deficiency (Related to Figure 3)**

**[A]** Images of Arabidopsis plants exposed to four individual GMV components, including diacetyl (DA), 2,3-butanediol (BTDL), 2-methyl-1-propanol (MP) and acetoin (ATN). The compounds were applied at dosages that, when the compounds totally evaporate from the agar-containing solid droplets, would yield in volatile concentrations of 9.7  $\mu\text{g}$  (DA), 32.5  $\mu\text{g}$  (BTDL), 7.9  $\mu\text{g}$  (MP) and 28.5  $\mu\text{g}$  (ATN) per mL free space in the petri dish, which resembled the 1 : 3.3 : 0.8 : 2.9 ratio among the four GMV components in natural GMVs (Farag et al., 2006). **[B]** Hyper induction of PS2 and MYB75 was specifically observed in Pi-deficient plants with exposure to DA. Bar indicates means  $\pm$  SE of two biological replicates. **[C]** Anthocyanin accumulation levels in plants exposed to different dosages of DA. Asterisks denote significantly different means at  $p < 0.0001$ , student t-test. **[D]** DA strongly induced the expression of Arabidopsis genes involved in anthocyanin biosynthesis. Bar indicates mean  $\pm$  SE ( $n=3$ ), two biological replicates were analyzed with similar results. **[E]** Measurements of soluble Pi contents in Arabidopsis plants grown with or without DA exposure. The boxplots show representative data from two independent experiments. **[F]** Compared to the wild type plants, *phr1ph1* showed substantially decreased PSR gene hyper induction that was triggered by DA. Bar indicates mean  $\pm$  SE ( $n=3$ ), two biological replicates were analyzed with similar results. The boxplots show representative data from three independent experiments. Different letters denote significantly different means at  $p < 0.05$ , Tukey's multiple comparison test.

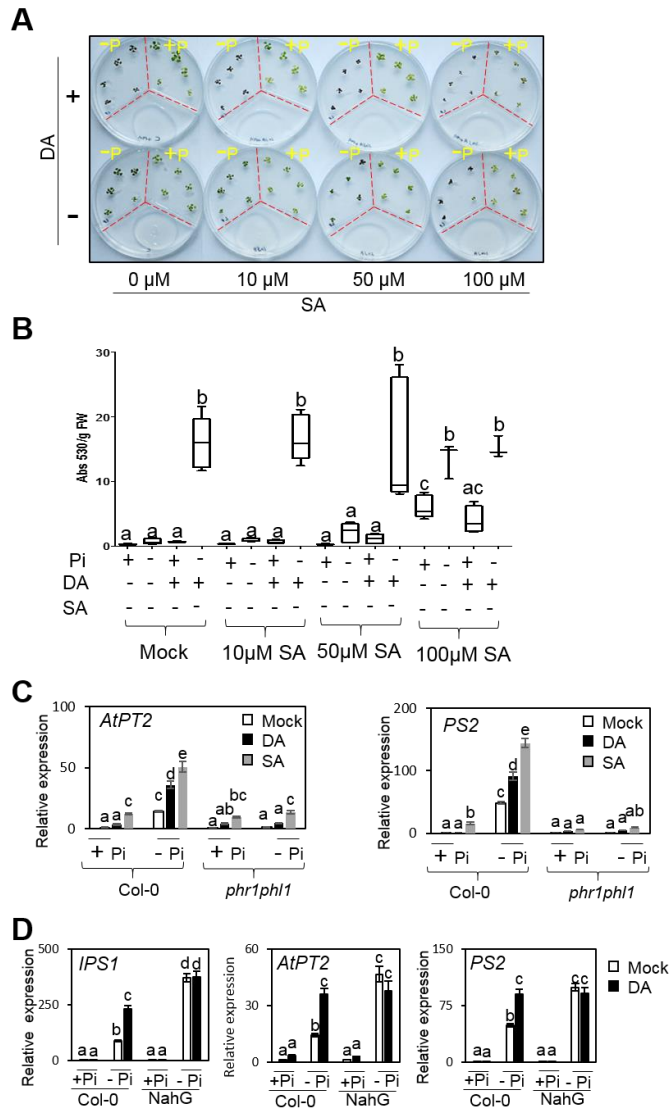

**Appendix Figure S4. Exogenous SA mimics DA in triggering plant hyper sensitivity to Pi deficiency (Related to Figure 4)**

**[A]** Images of plants treated with different dosages of SA in the plant growth medium. **[B]** Quantification of anthocyanin accumulation levels in plants treated with different dosages of SA. **[C]** Exogenous application of SA mimics DA-induced *AtPT2* and *PS2* gene induction patterns in Pi-deficient plants. **[D]** Quantification of *IPS1*, *AtPT2*, and *PS2* gene expression levels in *NahG* plants. The boxplots show representative data from three independent experiments. qPCR results show values of means  $\pm$  SE ( $n=3$ ), two biological replicates were analyzed with similar results. Different letters denote significantly different means at  $p < 0.05$ , Tukey's multiple comparison test.

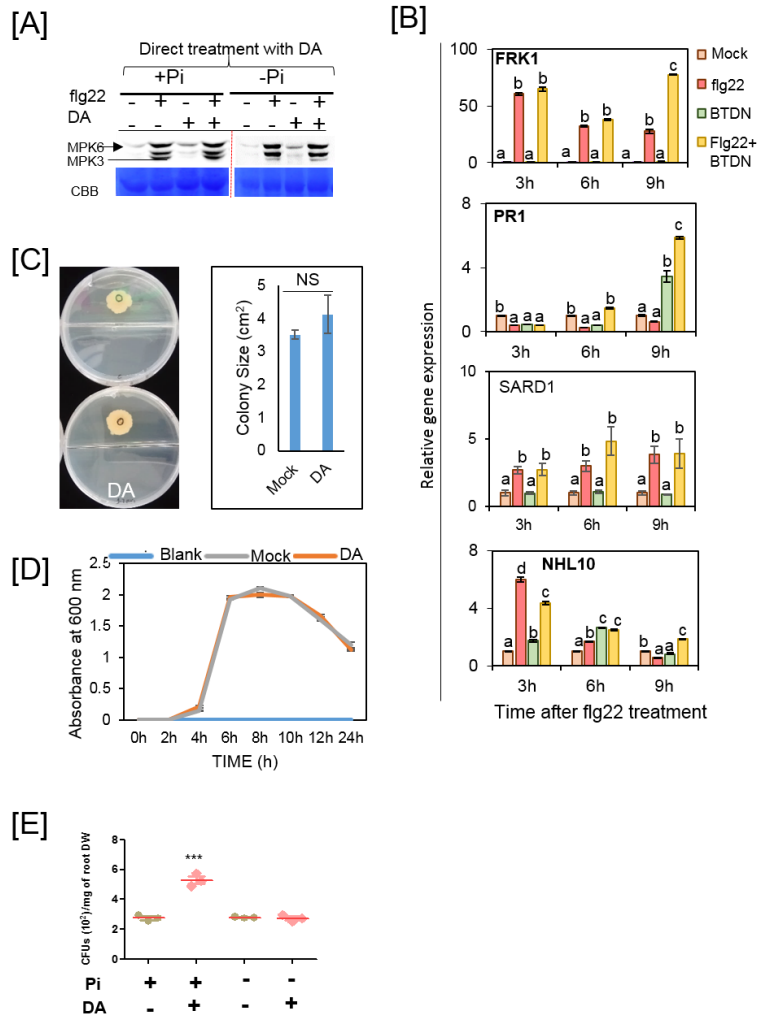

### Appendix Figure S5. DA suppresses plant ROS burst but not PTI gene expression in response to flg22 (Related to Figure 5)

**[A]** flg22-induced MPK3/MPK6 phosphorylation in *Arabidopsis* is not decreased by DA. Kinase assays were performed at 5 min after flg22 treatment. Three independent experiments were performed and similar results were observed. **[B]** Expression patterns of several flg22-induced PTI-responsive genes in the presence or absence of DA treatments. qPCR results show values of means  $\pm$  SE of three biological replicates. Different letters denote significantly different means at  $p < 0.05$ , Tukey's multiple comparison test within each group of the same DAT. **[C]** DA has no effect on GB03 bacterial colony size, graph shows means  $\pm$  SE ( $n=3$ ) of three colony sizes, three independent experiments showed similar results. Statistical analysis was done at  $p < 0.05$ , student t-test. **[D]** DA has no effect on GB03 growth pattern, graph shows means  $\pm$  SE ( $n=3$ ) of replicates, three independent experiments showed similar results. **[E]** DA is unable to induce higher root colonization by GB03 in wild type *Arabidopsis* (*Col-0*) grown on P-deficient medium. Asterisk denotes significantly different means at  $p < 0.05$  compared with *Col-0* without DA treatment, data shows mean  $\pm$  SE ( $n=3$ ), three biological replicates, student t-test. Three independent experiments were analyzed with similar results.

**Appendix Table S1 Individual components tested for GMV-induced plant hyper PSR**

|    | Name                | Chemical structure                                                                  | Different concentrations tested |                                                           |
|----|---------------------|-------------------------------------------------------------------------------------|---------------------------------|-----------------------------------------------------------|
|    |                     |                                                                                     | In medium                       | By emission only                                          |
| 1. | 2,3-Butanediol      | 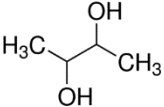   | 100,200,<br>250 $\mu$ M         | 9.7 and 32.5 $\mu$ g/ml free space of 9 cm petri dish     |
| 2. | 1-Propanol-2-Methyl |    | 100,200,<br>250 $\mu$ M         | 7.9 and 9.7 $\mu$ g/ml free space of 9 cm petri dish      |
| 3. | 3-Methylbutanal     |    | 100,200,<br>250 $\mu$ M         | Not performed                                             |
| 4. | Ethyl acetate       |    | 100, 250,<br>500 $\mu$ M        | Not performed                                             |
| 5. | 2,3-Butanedione     |   | 200 $\mu$ M                     | 2.4, 4.8 and 9.7 $\mu$ g/ml free space of 9 cm petri dish |
| 6. | Acetoin             |  | 100,200,<br>250 $\mu$ M         | 9.7 and 28.5 $\mu$ g/ml free space of 9 cm petri dish     |
| 7. | 1-Pentanol          |  | 10, 20, 50<br>mM                | Not performed                                             |

AppendixFigS3 reference:

Farag MA, Ryu CM, Sumner LW, Paré PW (2006) GC-MS SPME profiling of rhizobacterial volatiles reveals prospective inducers of growth promotion and induced systemic resistance in plants. *Phytochemistry* 67: 2262-2268
